# Supplementary material for: Enhancing DLG2 Implications in Neuropsychiatric Disorders: Analysis of a Cohort of Eight Patients with 11q14.1 Imbalances
Source: MDPI journal article supplement (doi:10.3390/genes13050859), 2022-05-12

**Table S1: Anamnesis, exams and physical features of the patients**

| Pt                                       | 1                                                                                            | 2                                                                                                                                                                                                                                                      | 3                                                                                          | 4                                                                                                                                                                                                                                     | 5                                                                                                                                                                                    | 6                                                                                                        | 7                                                                                                                                                             | 8                                                                                                                                                        |
|------------------------------------------|----------------------------------------------------------------------------------------------|--------------------------------------------------------------------------------------------------------------------------------------------------------------------------------------------------------------------------------------------------------|--------------------------------------------------------------------------------------------|---------------------------------------------------------------------------------------------------------------------------------------------------------------------------------------------------------------------------------------|--------------------------------------------------------------------------------------------------------------------------------------------------------------------------------------|----------------------------------------------------------------------------------------------------------|---------------------------------------------------------------------------------------------------------------------------------------------------------------|----------------------------------------------------------------------------------------------------------------------------------------------------------|
| Pre-perinatal parameters and information | Spontaneous vaginal birth at term<br>W: 2,910 g<br>L: NA<br>OFC: NA<br>Apgar scores: 10 (5') | Spontaneous vaginal birth at term<br>W: 2,990 g<br>L: 49 cm<br>OFC: NA<br>Apgar scores: NA                                                                                                                                                             | Spontaneous vaginal birth at term<br>W: 3,100 g<br>L: 49 cm<br>OFC: NA<br>Apgar scores: NA | Alcohol assumption during pregnancy<br>Born by cesarean section at 41st gw.<br>W: 2800 g (SGA)<br>L 47 cm. OFC: NA<br>Apgar scores: NA<br>Perinatal sufferance, neonatal sepsis, diaphragmatic lymphoadenopathy, feeding difficulties | Spontaneous vaginal birth at term<br>W: 2,750 g (SGA)<br>L: 49 cm<br>OFC: 35 cm<br>Apgar scores: 9 (1'), 9 (5')                                                                      | Born by planned cesarean section at term<br>W: 2,600 g (SGA)<br>L: NA<br>OFC: NA.<br>Apgar scores: NA    | Born at 31st GW by cesarean section due to maternal gestosis and oligohydramnios<br>W: 1100 g (SGA)<br>L: 34 cm<br>OFC: 27 cm<br>Apgar scores: 5 (1'), 5 (5') | Spontaneous vaginal birth at term (41st GW + 5 days)<br>by spontaneous delivery.<br>W: 3550 g<br>L: 58 cm<br>CC: 38 cm<br>Apgar scores 10, (1'), 10 (5') |
| Family history                           | Negative                                                                                     | NA                                                                                                                                                                                                                                                     | Negative                                                                                   | Learning difficulties and attention deficit reported in his father                                                                                                                                                                    | Motor dyspraxia, congenital clubfoot (Father)<br>ASD (maternal cousin)                                                                                                               | Epilepsy and depressive mood in maternal line; ASD and ID in his sister (negative for 11q14 deletion).   | ASD, anxiety and depressive mood in maternal line                                                                                                             | LD in paternal line. Social difficulties and academical interests in maternal line.                                                                      |
| Instrumental and other genetic exams     | Neurometabolic workup: N<br>ECG: N                                                           | <i>FMRI</i> analysis: N                                                                                                                                                                                                                                | Ophtalmologic evaluation: N<br>Audiologic evaluation: N<br>ECG: N<br>FMR1 analysis: N      | Ecocardiography: N<br>Abdominal ultrasound: N<br>PTPN11 analysis: N<br>SOS1 analysis: N<br>SHOX analysis: N                                                                                                                           | ABR: Acoustic threshold 50 dB nHL in right ear and 20 dB nHL in left ear<br>Dermatologic evaluation: Three cutaneous angiomas<br>Thyroid function evaluation and celiac screening: N | ECG: N<br>Echocardiography: N<br>Hormone dosage: mild ACTH, TSH and insulin increase<br>FMR1 analysis: N | Echocardiography: interatrial septum defect and patent foramen ovale.<br>ECG: N<br>FMR1 analysis: N                                                           | ECG: N<br>Abdominal ultrasound: N<br>FMR1 analysis: N<br>Metabolic workup: gluten intolerance                                                            |
| Physical examination                     | No dysmorphic features                                                                       | Microcephaly, up-turned palpebral rims, large incisors, micrognathia, simple auricles, sparse eyebrows in the distal-third, clinodactyly of the fifth finger, big hands' and feet's thumbs, hyperchromic mark on the right cheek and on the left thigh | Frontal bossing, high hairline, down-turned palpebral rims, pointed chin                   | Slow growth<br>GH deficit                                                                                                                                                                                                             | Flat angioma on the right parietal area of the head, on the right region of the chest and on the left palm                                                                           | Obesity<br>Acanthosis nigricans<br>Rubrae Striae<br>Elongated eyelid rims<br>Tapered Fingers             | Hypospadia<br>Tapered fingers<br>Bilateral Sandal Gap<br>Overweight                                                                                           | Macrocephaly                                                                                                                                             |

ABR: Auditory Brainstem Responses; ASD: Autism Spectrum Disorder; ECG: electrocardiogram; GH: Growth hormone; GW: gestational week; ID: Intellectual Disability; IUGR: intrauterine growth retardation; L: length; LD: Language disorder; N: Normal; NA: not available; OFC: occipito-frontal circumference; Pt: patient; SGA: Small for gestational age; W: Weight.

**Table S2: Genes harbored in the additional CNVs detected in patient 1, 3 and 6.**

| GENE             | NAME                                                    | FUNCTION                                                                                                                                                                                                                                              | ESPRESSION                                               | DISEASE                                                       |
|------------------|---------------------------------------------------------|-------------------------------------------------------------------------------------------------------------------------------------------------------------------------------------------------------------------------------------------------------|----------------------------------------------------------|---------------------------------------------------------------|
| <b>Patient 1</b> |                                                         |                                                                                                                                                                                                                                                       |                                                          |                                                               |
| <i>TMEM126B</i>  | Transmenbrane protein 126B                              | This gene encodes a mitochondrial transmembrane protein which is a component of the mitochondrial complex I assembly complex. The encoded protein serves as an assembly factor that is required for formation of the membrane arm of the complex.     | Ubiquitous                                               | Mitochondrial complex I deficiency, nuclear type 29 (#618250) |
| <i>TMEM126A</i>  | Transmenbrane protein 126A                              | The protein encoded by this gene is a mitochondrial membrane protein of unknown function. Defects in this gene are a cause of optic atrophy type 7 (OPA7).                                                                                            | Ubiquitous                                               | Optic atrophy 7 (#612989)                                     |
| <i>CREBZF</i>    | CREB/ATF bZIP transcription factor                      | Involved in negative regulation of gene expression, epigenetic; regulation of transcription, DNA-templated; and response to virus.                                                                                                                    | Ubiquitous                                               |                                                               |
| <i>CCDC89</i>    | Coiled-coil domain containing 89                        | Unknown. Predicted to be located in cytoplasm and nucleus.                                                                                                                                                                                            |                                                          |                                                               |
| <i>SYTL2</i>     | Synaptotagmin like 2                                    | This protein plays a role in vesicle trafficking and controls melanosome distribution in the cell periphery.                                                                                                                                          | Broad                                                    |                                                               |
| <i>CCDC83</i>    | Coiled-coil domain containing 83                        |                                                                                                                                                                                                                                                       | Testis                                                   |                                                               |
| <i>PICALM</i>    | Phosphatidylinositol binding clathrin assembly protein  | PICALM is involved in cellular trafficking, regulation of endocytosis, and clathrin-mediated vesicle formation. It is tightly associated with iron homeostasis and cell proliferation, and these processes are strongly tied to embryonic development | Ubiquitous                                               |                                                               |
| <b>Patient 3</b> |                                                         |                                                                                                                                                                                                                                                       |                                                          |                                                               |
| <i>SLC35F3</i>   | Solute carrier family 35 member F3                      | Involved in thiamine transport. Predicted to be integral component of membrane                                                                                                                                                                        | Mainly espressed in brain (RPKM 3.2), adrenal (RPKM 0.5) |                                                               |
| <i>ARSB</i>      | Arylsulfatase B                                         | Arylsulfatase B encoded by this gene belongs to the sulfatase family. The protein is targeted to the lysosome.                                                                                                                                        | Ubiquitous                                               | Mucopolysaccharidosis type VI (Maroteaux-Lamy) (#253200)      |
| <i>DMGDH</i>     | <b>Dimethylglycine Dehydrogenase</b>                    | Dimethylglycine dehydrogenase is an enzyme involved in the catabolism of choline, catalyzing the oxidative demethylation of dimethylglycine (DMG) to form sarcosine.                                                                                  | Kidney, Liver, Fat                                       | Dimethylglycine dehydrogenase deficiency (#605850)            |
| <i>BHMT2</i>     | Betaine--homocysteine S-methyltransferase 2             | BHMT2 is a zinc metalloenzyme that uses S-methylmethionine (SMM) as a methyl donor for the methylation of homocysteine                                                                                                                                | Kidney, Liver                                            |                                                               |
| <i>JMY</i>       | Junction mediating and regulatory protein, p53 cofactor | Predicted to be involved in several processes. MY is a stress-responsive protein involved in regulation of p53 activity. JMY also has actin-nucleating activity and plays a role in cell motility                                                     | Ubiquitous                                               |                                                               |

| Patient 6     |                                                                         |                                                                                                                                                                                                                                                                                                                                                                                        |                                                                                                                                       |  |
|---------------|-------------------------------------------------------------------------|----------------------------------------------------------------------------------------------------------------------------------------------------------------------------------------------------------------------------------------------------------------------------------------------------------------------------------------------------------------------------------------|---------------------------------------------------------------------------------------------------------------------------------------|--|
| <i>VCX</i>    | Homo sapiens variable charge X-linked (VCX), transcript variant 2, mRNA | This gene belongs to the VCX/Y gene family, which has multiple members on both X and Y chromosomes, and all are expressed exclusively in male germ cells. VCX/Y genes encode small and highly charged proteins of unknown function. The presence of a putative bipartite nuclear localization signal suggests that VCX/Y members are nuclear proteins. [provided by RefSeq, Jul 2008]. | Testis                                                                                                                                |  |
| <i>PNPLA4</i> | Patatin/like Phospholipase Domain/Containing Protein 4                  | The PNPLA4 gene encodes a protein with both triacylglycerol lipase and transacylase activities                                                                                                                                                                                                                                                                                         | Gene was expressed in all human tissues examined, including heart, brain, placenta, lung, liver, muscle, kidney, pancreas, and spleen |  |
| <i>MIR561</i> | Homo sapiens microRNA 561 (MIR561), microRNA.                           |                                                                                                                                                                                                                                                                                                                                                                                        |                                                                                                                                       |  |

Name, function, expression profile and the associated disease are reported for each gene

**Table S3: Coding sequences involved in the CNVs of DLG2 gene.**

|          | Exons         | ENSEMBL         | Genomic Coordinates          | Lenght | N. aa | Aminoacidic sequence                                                                                           |
|----------|---------------|-----------------|------------------------------|--------|-------|----------------------------------------------------------------------------------------------------------------|
| <b>A</b> | ex 2 DLG2-220 | ENSE00001469378 | chr11: 85,111,735-85,111,661 | 75 bp  | 25    | QNQGRCPAQNCSVEAPAWMPVHHCT                                                                                      |
|          | ex 6 DLG2-203 |                 |                              |        |       |                                                                                                                |
|          | ex 6 DLG2-232 |                 |                              |        |       |                                                                                                                |
| <b>B</b> | ex1 DLG2-207  | ENSE00002179742 | chr11:84,923,589-84,923,077  | 513 pb | 14    | <b>5'UTR</b> + MFFACYCALRTNVK                                                                                  |
|          | ex1 DLG2-218  | ENSE00002149728 | chr11:84,923,180-84,923,077  | 104 pb |       |                                                                                                                |
|          | ex1 DLG2-230  | ENSE00002188311 | chr11:84,923,421-84,923,077  | 345 pb |       |                                                                                                                |
| <b>C</b> | ex1 DLG-231   | ENSE00003840932 | chr11:84.720.915-84.720.296  | 620 pb | 34    | <b>5'UTR</b> +MSPVVKDPDCFTPMICHCKVACTNNTLSLMFGCK                                                               |
| <b>D</b> | ex7 DLG2-203  | ENSE00003487678 | chr11:84,534,731-84,534,570  | 162 pb | 54    | KYRYQDEDA PHD HSLPRLTHEVRGPELVHVSEKNLSQIENVHGYVLQSHISPLK                                                       |
|          | ex 7 DLG2-232 |                 |                              |        |       |                                                                                                                |
|          | ex2 DLG2-207  |                 |                              |        |       |                                                                                                                |
|          | ex2 DLG2-218  |                 |                              |        |       |                                                                                                                |
|          | ex2 DLG2-230  |                 |                              |        |       |                                                                                                                |
|          | ex2 DLG2-231  |                 |                              |        |       |                                                                                                                |
|          | ex3 DLG2-220  | ENSE00002174027 | chr11: 84,534,731-84,534,613 | 119pb  | 39    | KYRYQDEDA PHD HSLPRLTHEVRGPELVHVSEKNLSQIE + <b>3'UTR</b>                                                       |
| <b>E</b> | ex1 DLG2-221  | ENSE00002152856 | chr11: 84,437,809-84,437,388 | 422pb  | 26    | <b>5'UTR</b> + MFASIWYAKKLGRRFVHNARKAKSEK                                                                      |
| <b>F</b> | ex1 DLG2-201  | ENSE00001532570 | chr11: 84,317,339-84,316,825 | 515pb  | 107   | MNAYLTQKHSCSRGSDGMDAVRSAPTLIRDAHCACGWQRNCQGLGYSSQTMPSSGP<br>GGPASNRTGGSSFNRTLWDSVRKSPHKTSTKGKGTCEHCTCPHGWFSPAQ |
|          | ex1 DLG2-205  |                 |                              |        |       |                                                                                                                |
| <b>G</b> | ex1 DLG2-202  | ENSE00003587836 | chr11: 84,273,188-84,273,151 | 38pb   | 13    | <b>5'UTR</b> + XQCEQAMQHAFIP                                                                                   |
|          | ex1 DLG2-229  | ENSE00001469384 | chr1: 84,273,280-84,273,151  | 130pb  | 35    | <b>5' UTR</b> + MQRPSVSR AENYQLLWDTIASLKQCEQAMQHAFIP                                                           |
| <b>H</b> | Ex8 DLG2-203  | ENSE00003471737 | chr11:84,251,291-84,251,238  | 54pb   | 18    | ASPAPIIVNTD TLDTIPY                                                                                            |
|          | ex 8 DLG2-232 |                 |                              |        |       |                                                                                                                |
|          | EX3 DLG2-218  |                 |                              |        |       |                                                                                                                |
|          | EX3 DLG2-230  |                 |                              |        |       |                                                                                                                |
|          | EX3 DLG2-207  |                 |                              |        |       |                                                                                                                |
|          | EX3 DLG2-231  |                 |                              |        |       |                                                                                                                |
|          | EX2 DLG2-221  |                 |                              |        |       |                                                                                                                |
|          | EX2 DLG2-201  |                 |                              |        |       |                                                                                                                |
|          | EX2 DLG2-205  |                 |                              |        |       |                                                                                                                |
|          | EX2 DLG2-202  |                 |                              |        |       |                                                                                                                |
|          | EX2 DLG2-229  |                 |                              |        |       |                                                                                                                |

Description of the coding sequences involved in the CNVs of DLG2 gene. For each coding sequence (A to H) the corresponding exons of each transcript are reported, along with the Ensembl number, the hg38 coordinates (reverse strand), the extension in kb, the number of aminoacid encoded (N. aa), and the corresponding aminoacid sequence.

**Table S4: DLG2 protein coding transcripts involved in patients' imbalances.**

| Transcript ID          | Name     | aa     | Extension                 | Exons                          | Protein length (aa) | Expression information source  |
|------------------------|----------|--------|---------------------------|--------------------------------|---------------------|--------------------------------|
| ENST00000376104 (mane) | DLG2-203 | 975aa  | 11: 83,455,173-85,627,344 | Exons: 28<br>Coding exons 26   | 975                 | GTE <sub>x</sub> , UCSC        |
| ENST00000650630        | DLG2-232 | 1012aa | 11: 83,457,919-85,627,270 | Exons:28<br>Coding exons 27    | 1012                | none                           |
| ENST00000472545        | DLG2-215 | 52aa   | 11: 85,469,338-85,627,922 | Exons: 4,<br>Coding exons: 3   | 52                  | GTE <sub>x</sub> , UCSC        |
| ENST00000527088        | DLG2-220 | 74aa   | 11: 84,534,613-85,133,123 | Exons: 3,<br>Coding exons: 3   | 74                  | GTE <sub>x</sub> , UCSC        |
| ENST00000524982        | DLG2-218 | 866aa  | 11: 83,459,609-84,923,180 | Exons: 24,<br>Coding exons: 24 | 866                 | GTE <sub>x</sub> , UCSC        |
| ENST00000532653        | DLG2-230 | 852aa  | 11: 83,459,789-84,923,421 | Exons: 23,<br>Coding exons: 23 | 852                 | GTE <sub>x</sub> , UCSC        |
| ENST00000398309        | DLG2-207 | 870aa  | 11: 83,455,012-84,923,589 | Exons: 23,<br>Coding exons: 23 | 870                 | GTE <sub>x</sub> , UCSC        |
| ENST00000648622        | DLG2-231 | 890aa  | 11: 83,457,919-84,720,915 | Exons: 23,<br>Coding exons: 23 | 890                 | [9]                            |
| ENST00000527466        | DLG2-221 | 78aa   | 11: 84,098,995-84,437,809 | Exons: 4,<br>Coding exons: 4   | 78                  | GTE <sub>x</sub> , UCSC<br>[9] |
| ENST00000280241        | DLG2-201 | 909aa  | 11: 83,455,012-84,317,339 | Exons: 22,<br>Coding exons: 22 | 909                 | GTE <sub>x</sub> , UCSC        |
| ENST00000398301        | DLG2-205 | 552aa  | 11: 83,786,441-84,317,339 | Exons: 12,<br>Coding exons: 12 | 552                 | GTE <sub>x</sub> , UCSC        |
| ENST000003300141       | DLG2-202 | 797aa  | 11: 83,459,422-84,273,188 | Exons: 22,<br>Coding exons: 22 | 797                 | GTE <sub>x</sub> , UCSC        |
| ENST00000531015        | DLG2-229 | 811aa  | 11: 83,461,542-84,273,280 | Exons: 21,<br>Coding exons: 21 | 811                 | GTE <sub>x</sub> , UCSC        |

DLG2 protein coding transcripts involved in patients' imbalances. For each transcript, the Ensembl ID is reported along with the name, the genomic coordinates (hg38) (reverse strand), the number of exons (total and coding), the protein length (aa= aminoacid), and where expression data can be found.

**Figure S1: Expression of some DLG2 transcripts across tissues from GTEx Pro**

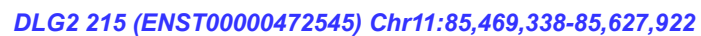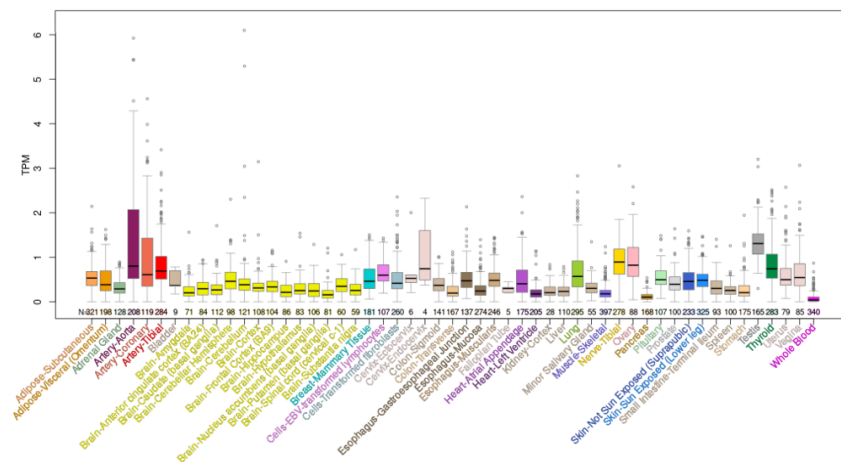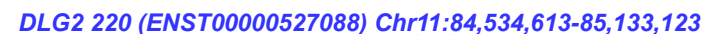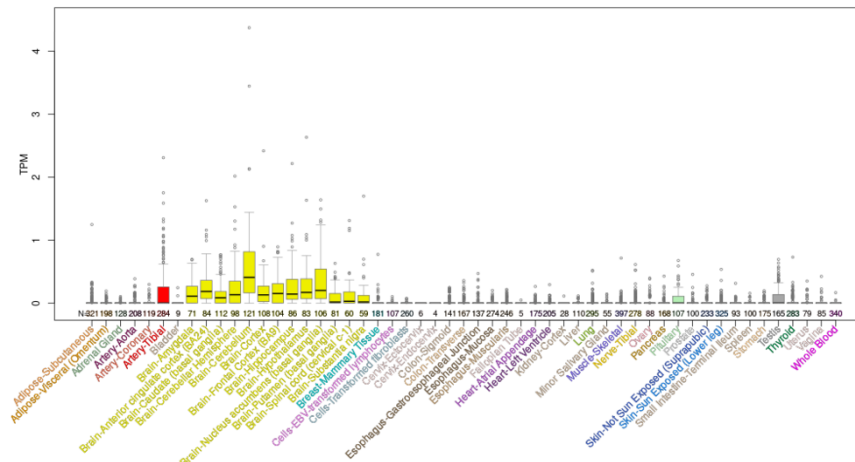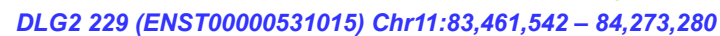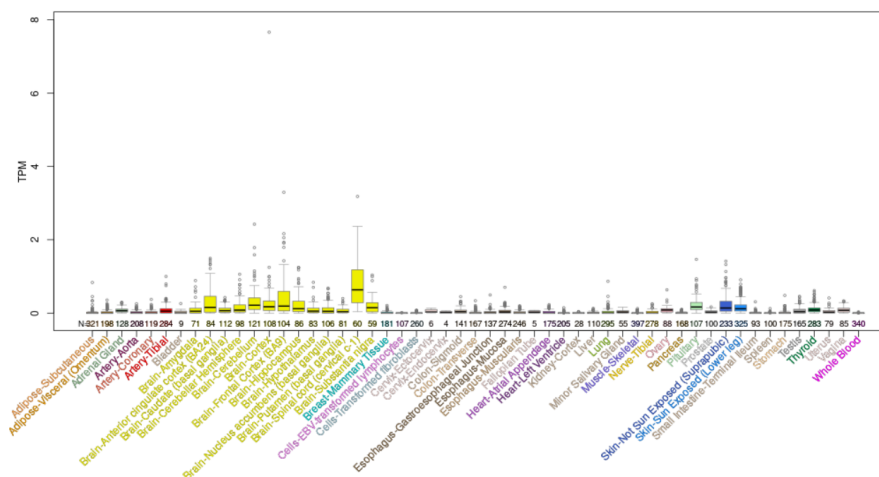

**DLG2 218 (ENST00000528942) Chr11:83,459,609 – 84,923,180**

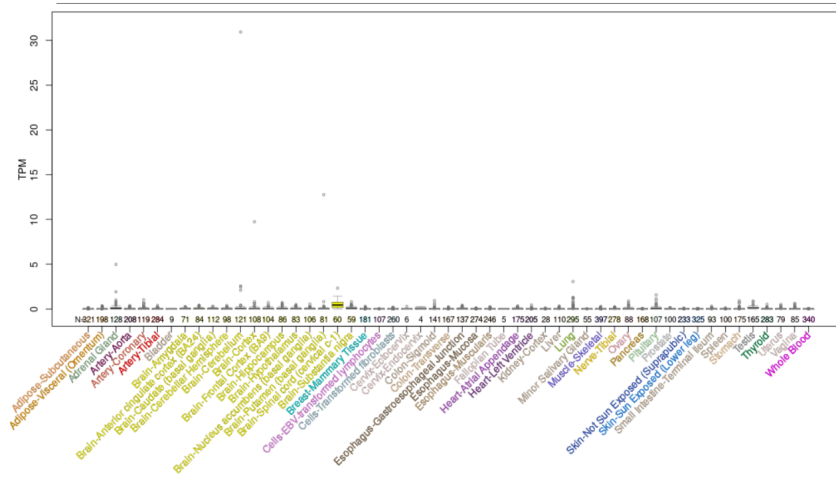

**DLG2 205 (ENST00000398301) Chr11:83,786,441 – 84,317,339**

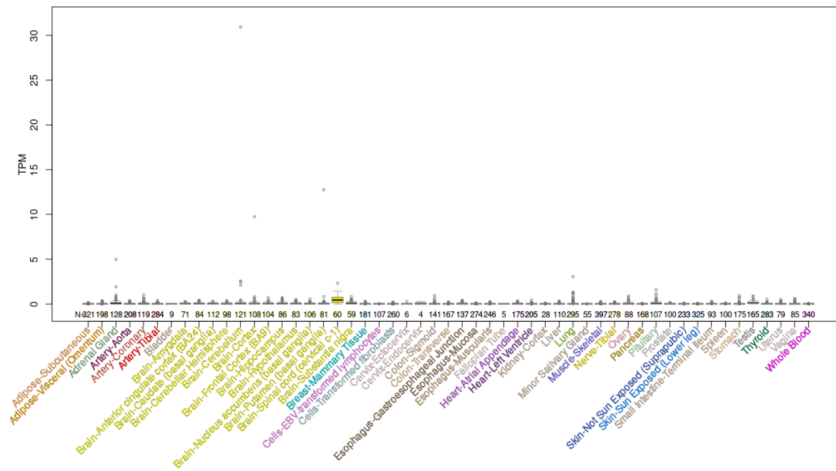

**DLG2 202 (ENST00000330014) Chr11:84,459,422 – 84,273,188**

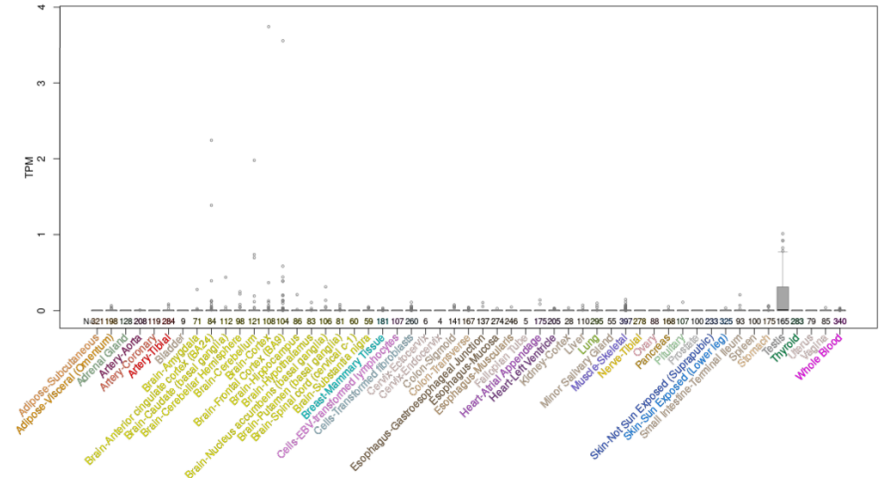

**DLG2 230 (ENST00000532653) Chr11:83,459,789 – 84,923,421**

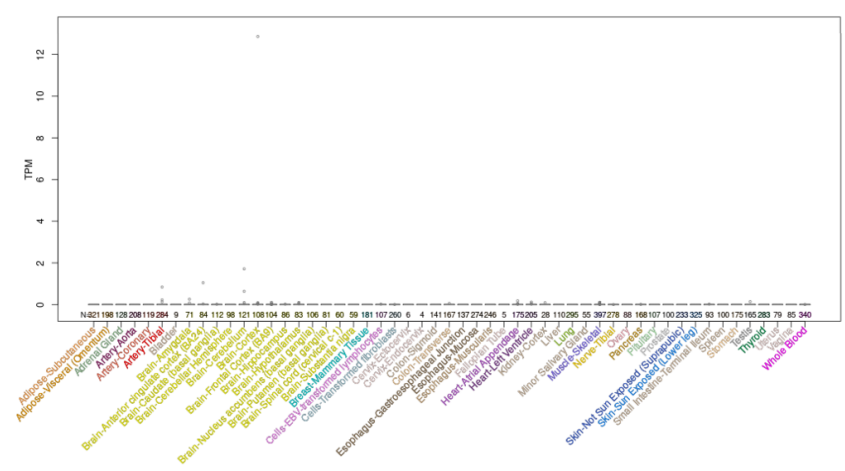

Supplement: s1 [file s1]
